# Supplementary material for: Effects of Vitamin D Supplementation on Adipose Tissue Inflammation and NF-κB/AMPK Activation in Obese Mice Fed a High-Fat Diet
Source: MDPI journal article supplement (doi:10.3390/ijms231810915), 2022-09-18
Supplement: s1 [file s1]

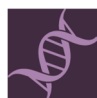

**Table S1. Primers used for real-time quantitative polymerase chain reaction (RT-qPCR).**

| Gene           | Accession number | Primer sequences (5'- 3')                                      |
|----------------|------------------|----------------------------------------------------------------|
| aP2            | NM_024406.2      | F: CGA CAG GAA GGT GAA GAG CA<br>R: ATT CCA CCA CCA GCT TGT CA |
| ASC-1          | NM_023258.4      | F: TTA ATC CCA GCA ACC AGG AG<br>R: CTT GAG TTA GGC CAG CCT TG |
| $\beta$ -actin | NM_007393        | F: GGA CCT GAC AGA CTA CCT CA<br>R: GTT GCC AAT AGT GAT GAC CT |
| CASP1          | NM_009807.2      | F: CAC AGC TCT GGA GAT GGT GA<br>R: CTT TCA AGC TTG GGC ACT TC |
| CD11c          | NM_001363985.1   | F: TTC ATC TCC ACG TCA AGC CC<br>R: AGG ACC TTG GTG GCA TCT TG |
| CD68           | NM_001291058.1   | F: AAA GGC CGT TAC TCT CCT GC<br>R: GGA GCT GGT GTG AAC TGT GA |
| IL-1 $\beta$   | NM_008361.4      | F: GCC CAT CCT CTG TGA CTC AT<br>R: AGG CCA CAG GTA TTT TGT CG |
| IL-6           | NM_031168.2      | F: CCT TCC TAC CCC AAT TTC CA<br>R: TAA CGC ACT AGG TTT GCC GA |
| iNOS           | NM_001313922.1   | F: CCA CAG CAA TAT AGG CTC AT<br>R: GGA TTT CAG CCT CAT GGT AA |
| MCP-1          | NM_011333.3      | F: AGG TCC CTG TCA TGC TTC TG<br>R: TCT GGA CCC ATT CCT TCT TG |
| NLRP3          | NM_145827.3      | F: ATG CTG CTT CGA CAT CTC CT<br>R: AAC CAA TGC GAG ATC CTG AC |
| PPAR $\gamma$  | NM_001127330.1   | F: TTG ATT TCT CCA GCA TTT CT<br>R: TGT TGT AAG GCT GGG TCT TT |
| SCD-1          | NM_009127.4      | F: ATG GAT ATC GCC CCT ACG AC<br>R: GAT GTG CCA GCG GTA CTC AC |
| SREBP-1c       | NM_001358315.1   | F: GCC TGC TTG GCT CTT CTC TT<br>R: AGG TCA GCT TGT TTG CGA TG |
| TNF $\alpha$   | NM_013693.2      | F: AGC ACA GAA AGC ATG ATC CG<br>R: GCC ACA AGC AGG AAT GAG AA |

ASC, apoptosis-associated speck-like protein containing a CARD; aP2, adipocyte protein 2; CASP1, caspase-1; CD, cluster of differentiation; IL, interleukin; iNOS, inducible nitric oxide synthase; MCP-1, monocyte chemoattractant protein-1; NLRP3, NOD-, LRR- and pyrin domain-containing protein 3; PPAR $\gamma$ , peroxisome proliferator-activated receptor  $\gamma$ ; SCD-1, stearoyl-CoA desaturase-1; SREBP-1c, sterol regulatory element-binding protein-1c; TNF $\alpha$ , tumor necrosis factor  $\alpha$ .
